# Supplementary material
Source: publisher site journal article supplement (https://www.dovepress.com/article/571116)
Supplement: Supplementary file 1 [file 571116_Revised%20supporting%20information_1.docx]

**Supporting Information**


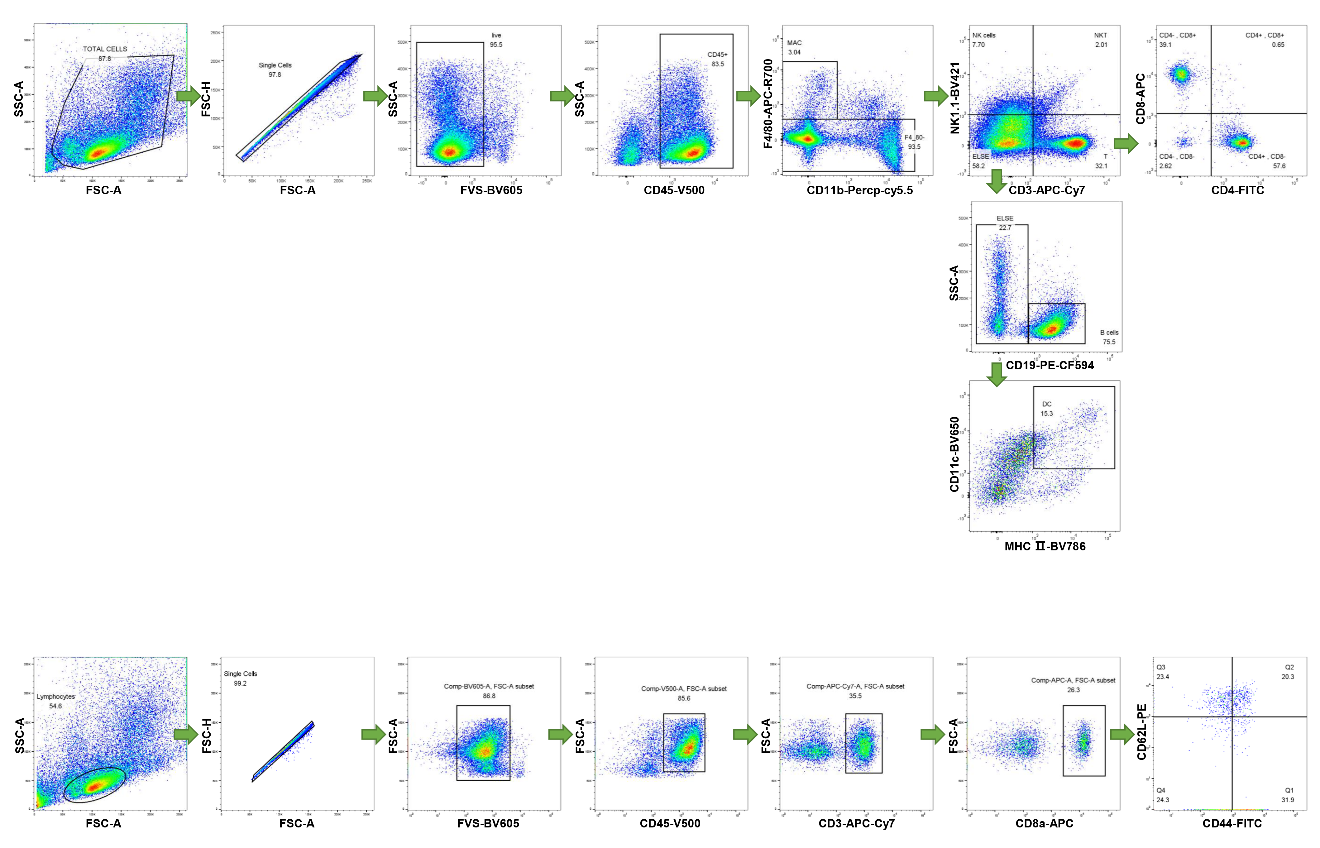


**Figure S1** Flow gate diagram of specific lymphocytes in spleen.


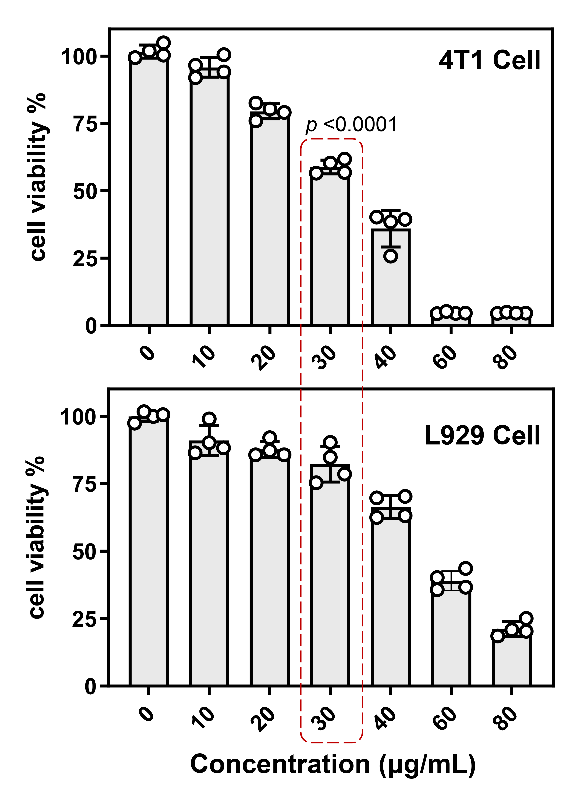


**Figure S2** Cell viability of 4T1 and L929 cells incubated with various concentrations (0, 10, 20, 30, 40, 60 and 80 μg/mL) of EGCG for 48 h (n=4), the red dotted line indicated the selected final concentration.


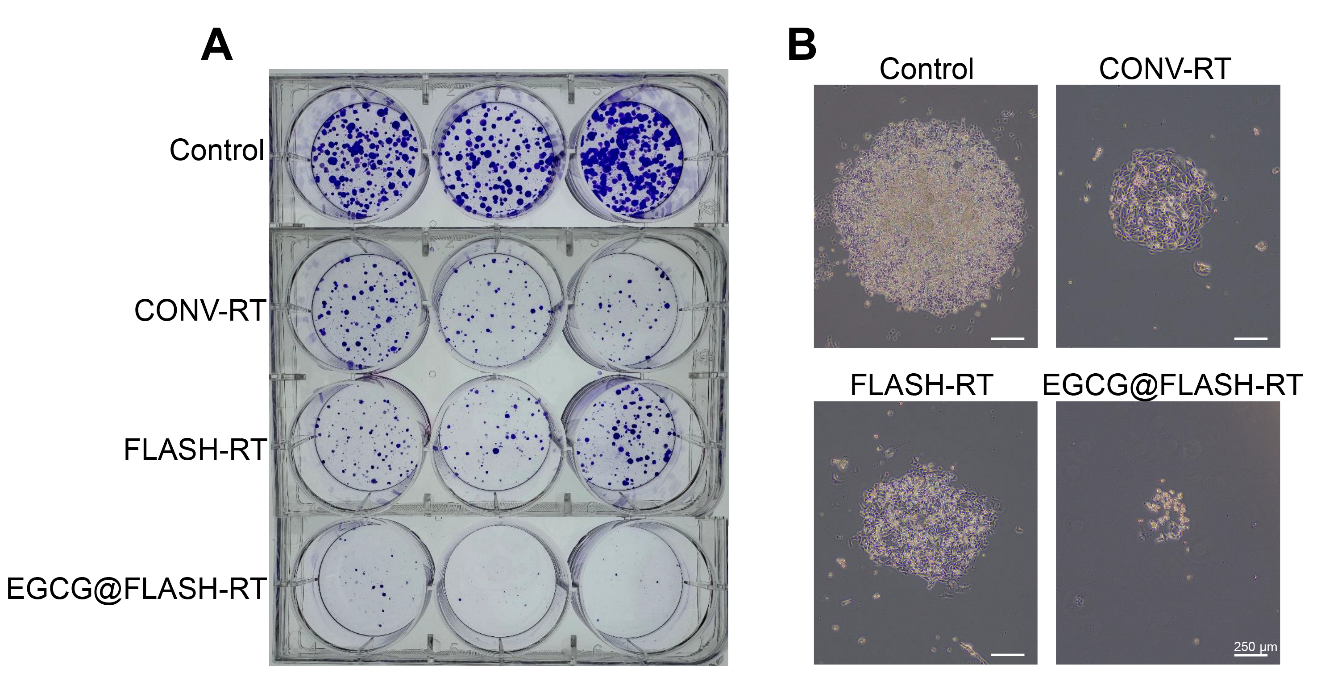


**Figure S3** Cell clone assay. The colony formation (A) and images of tumor sphere (B) after different treatments. Scale bar: 250 μm.


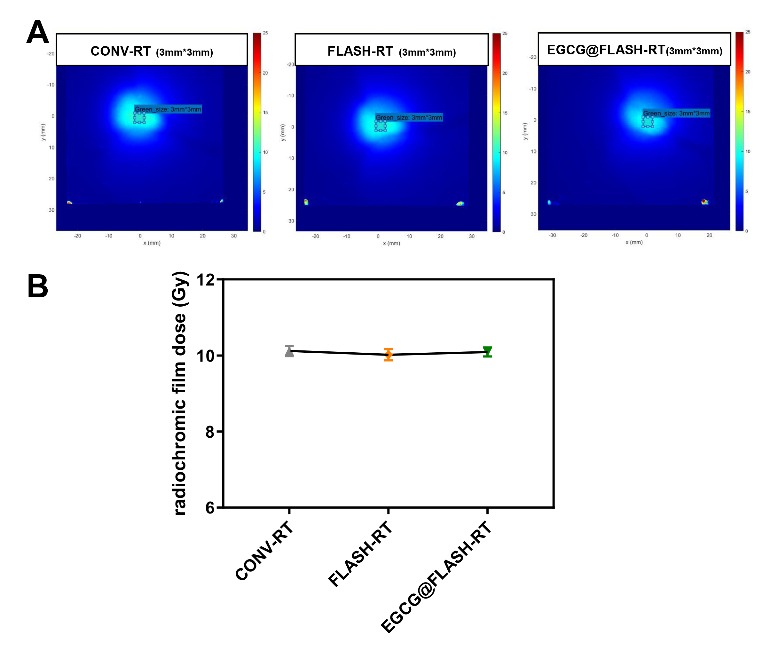


**Figure S4** Quantitative evaluation of radiochromic film dose. (A) Irradiated film images. (B) The curve of radiochromic film dose. The data were presented as the mean ± SD (n=4).


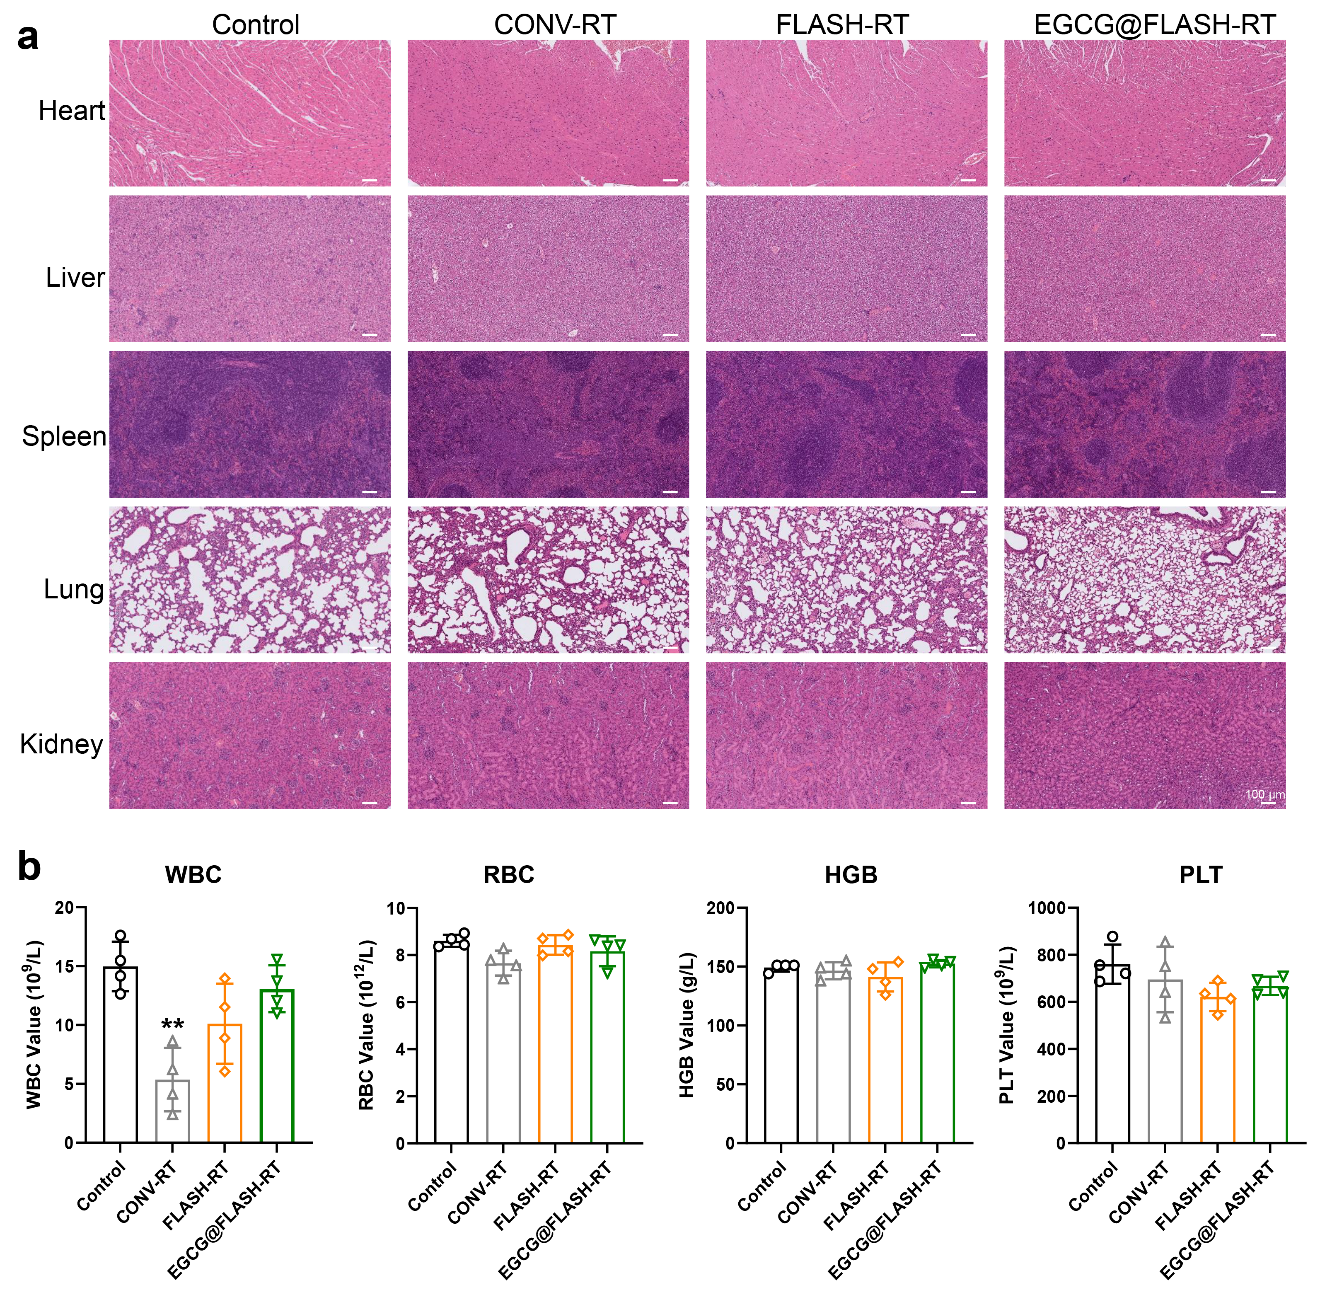


**Figure S5** Biosafety of EGCG@FLASH-RT. (A) H&E images of major organs (heart, liver, spleen, lung, and kidney) of mice treated with different treatments at day 10. Scale bar: 100 μm. (B) Blood routine data such as white blood cells (WBC), red blood cells (RBC), hemoglobin (HGB), and platelets (PLT) of mice after various treatments. The data were presented as the mean ± SD (n=4). ∗∗*P* < 0.01.


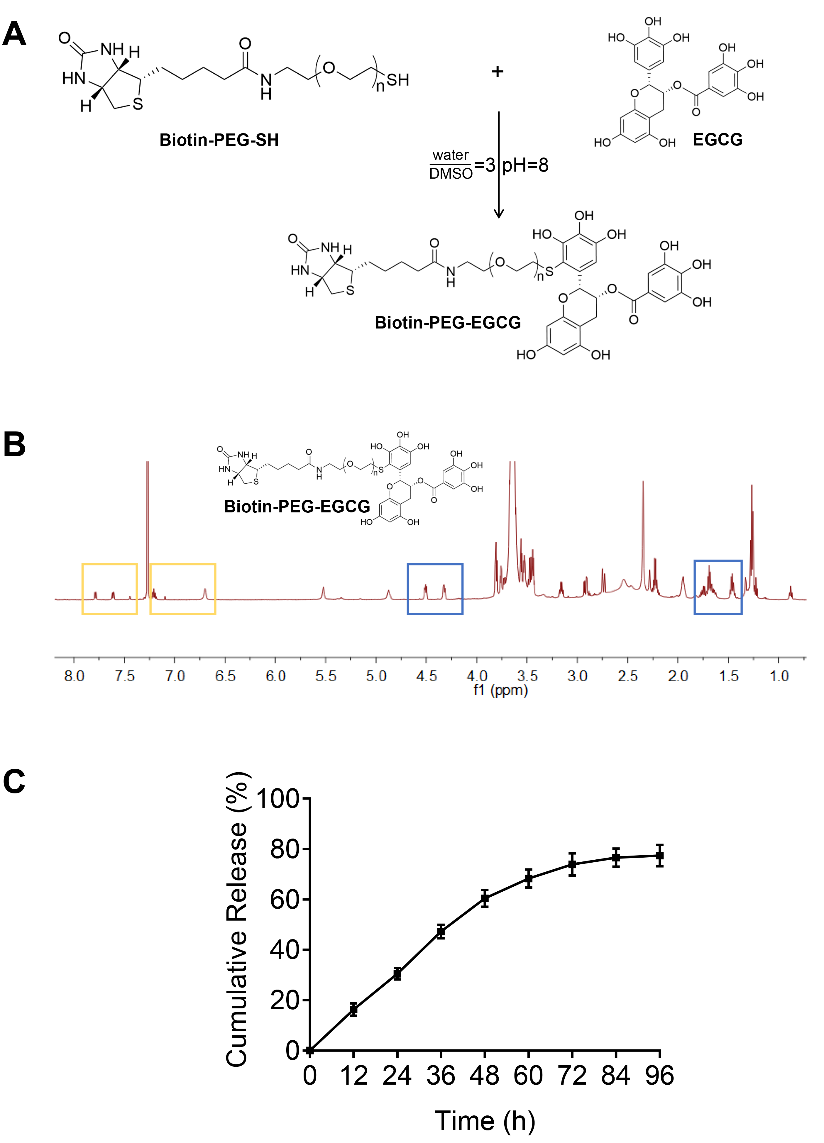


**Figure S6** Characterization of Biotin-PEG-EGCG and release kinetics of BENPs. (A) Synthetic route of Biotin-PEG-EGCG. (B) The 1H NMR spectra of Biotin-PEG-EGCG, the blue labeled boxes indicated the characteristic peaks of Biotin and the yellow labeled boxes marked the characteristic peaks of EGCG. (C) The release kinetics of BENPs.


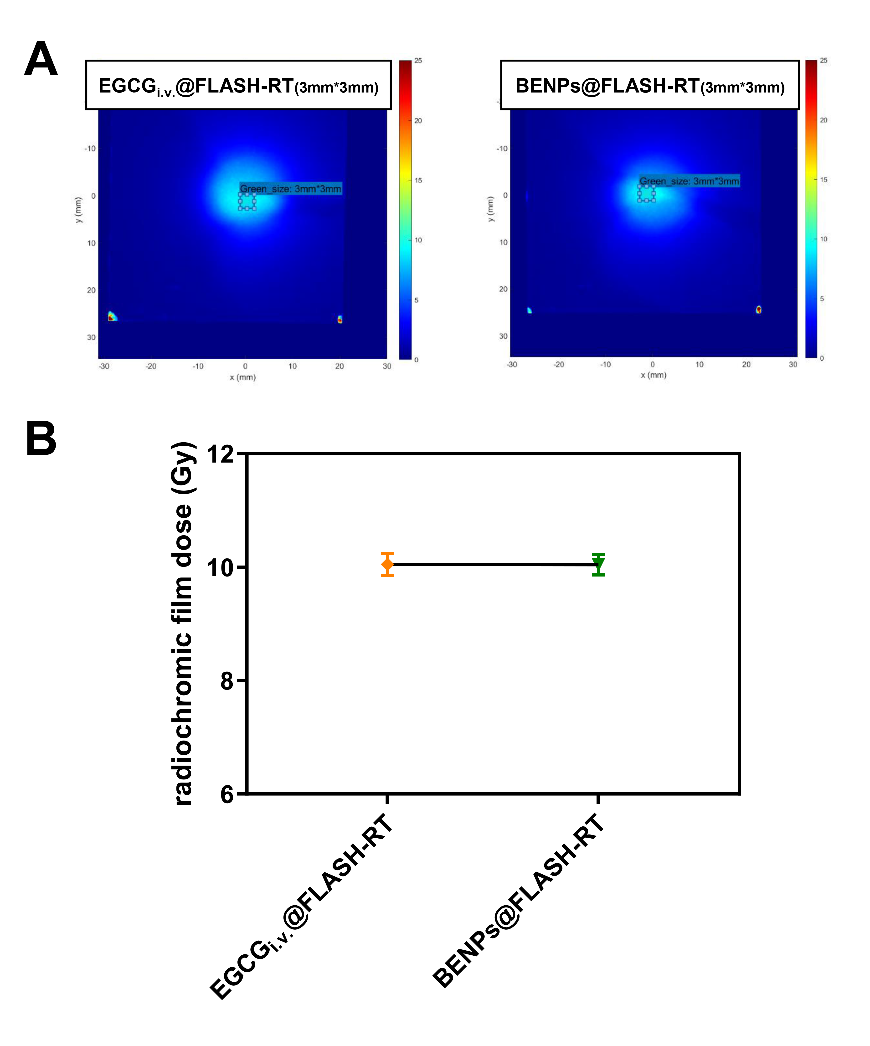


**Figure S7** Quantitative evaluation of radiochromic film dose. (A) Irradiated film images. (B) The curve of radiochromic film dose. The data were presented as the mean ± SD (n=4).


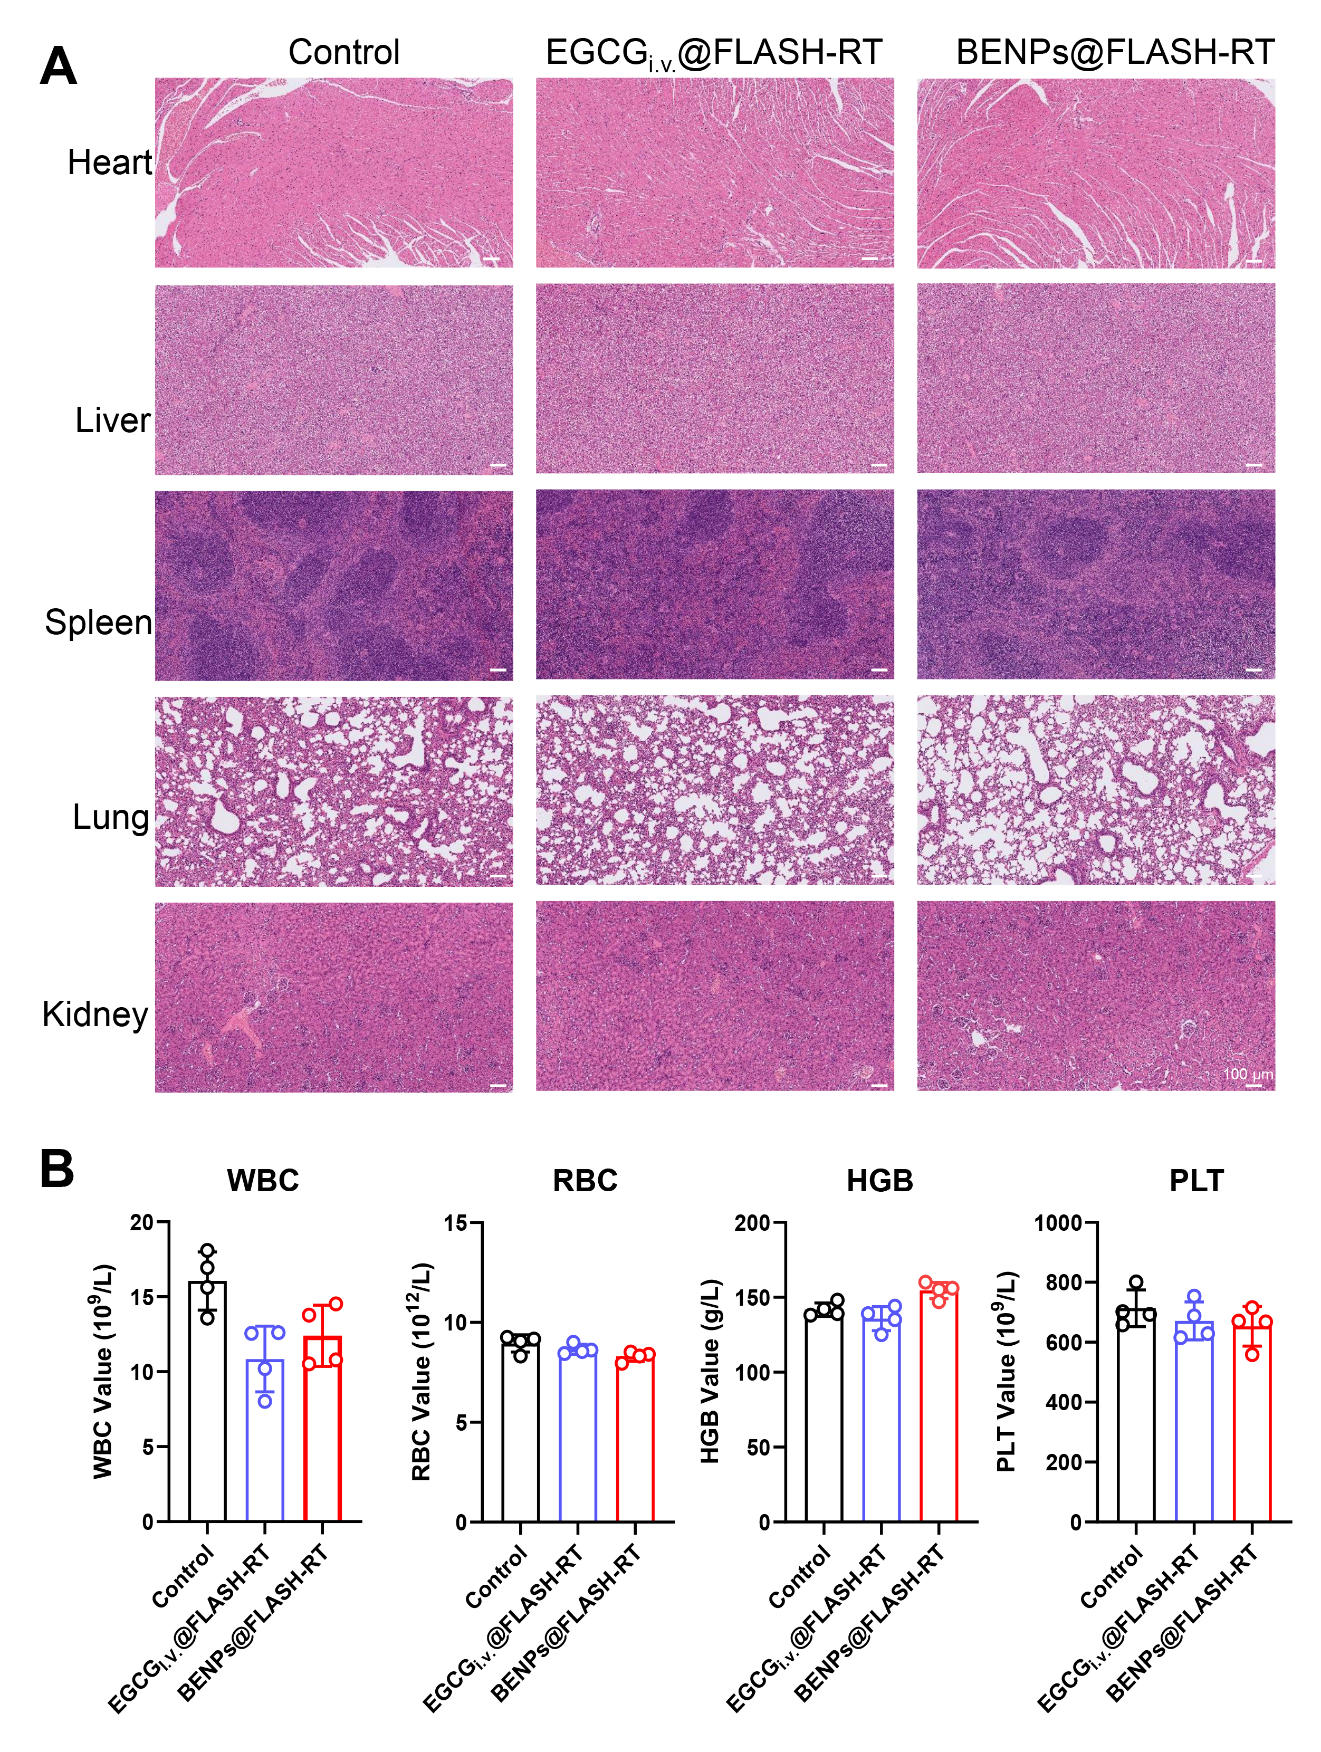


**Figure S8** Biosafety of BENPs@FLASH-RT. (A) H&E images of major organs of mice treated with different treatments at day 10. Scale bar: 100 μm. (B) Blood routine data of mice after various treatments. The data were presented as the mean ± SD (n=4).


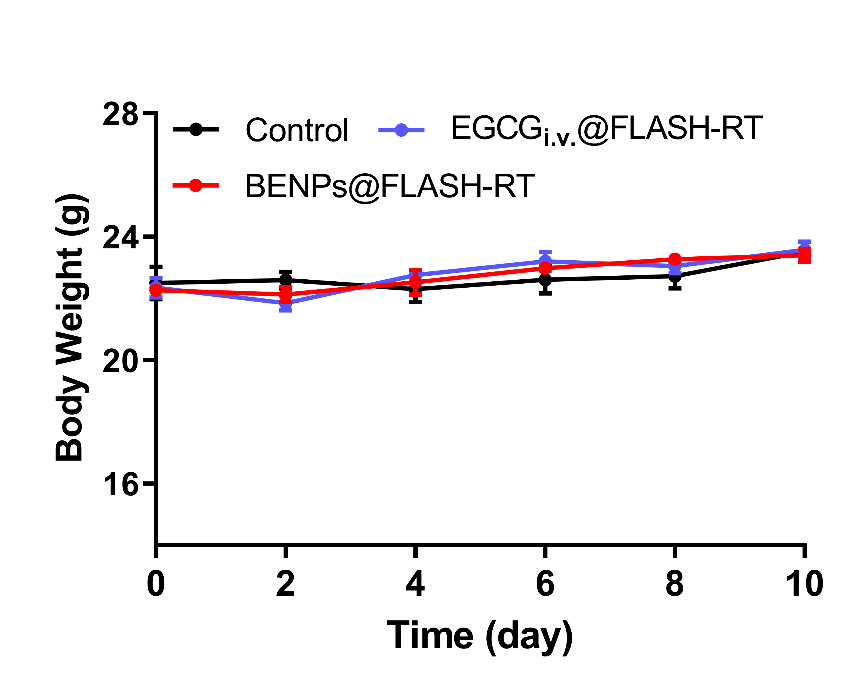


**Figure S9** Body weight of mice treated with EGCG and BENPs via tail vein injection after irradiation by FLASH from day 0 to 10.
